# Supplementary material for: Characterization by Gender of Frailty Syndrome in Elderly People according to Frail Trait Scale and Fried Frailty Phenotype
Source: MDPI journal article supplement (doi:10.3390/jpm12050712), 2022-04-29
Supplement: s1 [file s1]

## SUPPLEMENTARY DATA

### Statistical details of logistic regressions

The statistical analyses performed in each logistic regression are detailed below.

**Table S1.** Statistical details of logistic regressions using FP as dependent variable.

| Variable               | Frail vs Non-frail |                |     |         |         |                |     |         |         |                |     |         |
|------------------------|--------------------|----------------|-----|---------|---------|----------------|-----|---------|---------|----------------|-----|---------|
|                        | Model 1            |                |     |         | Model 2 |                |     |         | Model 3 |                |     |         |
|                        | S.E                | Wald statistic | d.f | p-value | S.E     | Wald statistic | d.f | p-value | S.E     | Wald statistic | d.f | p-value |
| Women                  | 0.354              | 1.473          | 1   | 0.225   | 0.373   | 0.910          | 1   | 0.340   | 0.377   | 0.707          | 1   | 0.401   |
| Age ≥ 75 years         | 0.293              | 0.008          | 1   | 0.930   | 0.302   | 0.106          | 1   | 0.745   | 0.303   | 0.090          | 1   | 0.764   |
| Years of education ≤ 8 |                    |                |     |         | 0.303   | 3.916          | 1   | 0.028   | 0.305   | 3.710          | 1   | 0.035   |
| BMI ≥ 25               |                    |                |     |         | 0.667   | 2.334          | 1   | 0.127   | 0.669   | 2.377          | 1   | 0.123   |
| Abdominal obesity      |                    |                |     |         | 0.383   | 0.628          | 1   | 0.643   | 0.384   | 0.638          | 1   | 0.424   |
| Living alone           |                    |                |     |         |         |                |     |         | 0.325   | 0.457          | 1   | 0.499   |
| Automedication         |                    |                |     |         |         |                |     |         | 0.449   | 0.167          | 1   | 0.683   |
| Variable               | Frail vs Non-frail |                |     |         |         |                |     |         |         |                |     |         |
|                        | Model 1            |                |     |         | Model 2 |                |     |         | Model 3 |                |     |         |
|                        | S.E                | Wald statistic | d.f | p-value | S.E     | Wald statistic | d.f | p-value | S.E     | Wald statistic | d.f | p-value |
| Women                  | 0.377              | 1.979          | 1   | 0.159   | 0.422   | 2.148          | 1   | 0.143   | 0.428   | 1.764          | 1   | 0.184   |
| Age ≥ 75 years         | 0.318              | 1.429          | 1   | 0.232   | 0.323   | 1.225          | 1   | 0.268   | 0.325   | 1.255          | 1   | 0.263   |
| Years of education ≤ 8 |                    |                |     |         | 0.333   | 0.024          | 1   | 0.878   | 0.338   | 0.001          | 1   | 0.973   |
| BMI ≥ 25               |                    |                |     |         | 0.708   | 2.149          | 1   | 0.143   | 0.718   | 2.621          | 1   | 0.105   |
| Abdominal obesity      |                    |                |     |         | 0.439   | 0.227          | 1   | 0.634   | 0.443   | 0.187          | 1   | 0.666   |
| Living alone           |                    |                |     |         |         |                |     |         | 0.366   | 1.672          | 1   | 0.196   |
| Automedication         |                    |                |     |         |         |                |     |         | 0.482   | 0.593          | 1   | 0.441   |

This table is related to Table 4 “Logistic regression for the association of frailty according to FP as a dependent variable with variables of relevance in health, adjusted by age and sex”. S.E, standard error; d.f, degree of freedom.

**Table S2.** Statistical details of logistic regressions using FTS-5 or FTS-3 as dependent variable.

| Variable                    | Frail vs Non-frail<br>(according to FTS-5) |                   |     |         |         |                   |     |         |         |                   |     |         |
|-----------------------------|--------------------------------------------|-------------------|-----|---------|---------|-------------------|-----|---------|---------|-------------------|-----|---------|
|                             | Model 1                                    |                   |     |         | Model 2 |                   |     |         | Model 3 |                   |     |         |
|                             | S.E                                        | Wald<br>statistic | d.f | p-value | S.E     | Wald<br>statistic | d.f | p-value | S.E     | Wald<br>statistic | d.f | p-value |
| Women                       | 0.345                                      | 0.054             | 1   | 0.816   | 0.367   | 0.001             | 1   | 0.979   | 0.374   | 0.0001            | 1   | 0.996   |
| Age $\geq$ 75 years         | 0.304                                      | 3.049             | 1   | 0.081   | 0.314   | 2.634             | 1   | 0.105   | 0.315   | 2.642             | 1   | 0.104   |
| Years of education $\leq$ 8 |                                            |                   |     |         | 0.315   | 0.944             | 1   | 0.331   | 0.317   | 0.976             | 1   | 0.323   |
| BMI $\geq$ 25               |                                            |                   |     |         | 1.056   | 3.957             | 1   | 0.047   | 1.060   | 3.784             | 1   | 0.052   |
| Abdominal obesity           |                                            |                   |     |         | 0.400   | 0.785             | 1   | 0.376   | 0.403   | 0.795             | 1   | 0.372   |
| Living alone                |                                            |                   |     |         |         |                   |     |         | 0.357   | 0.049             | 1   | 0.825   |
| Automedication              |                                            |                   |     |         |         |                   |     |         | 0.512   | 1.069             | 1   | 0.301   |

  

| Variable                    | Frail vs Non-frail<br>(according to FTS-5) |                   |     |         |         |                   |     |         |         |                   |     |         |
|-----------------------------|--------------------------------------------|-------------------|-----|---------|---------|-------------------|-----|---------|---------|-------------------|-----|---------|
|                             | Model 1                                    |                   |     |         | Model 2 |                   |     |         | Model 3 |                   |     |         |
|                             | S.E                                        | Wald<br>statistic | d.f | p-value | S.E     | Wald<br>statistic | d.f | p-value | S.E     | Wald<br>statistic | d.f | p-value |
| Women                       | 0.307                                      | 0.091             | 1   | 0.763   | 0.329   | 0.258             | 1   | 0.611   | 0.339   | 0.487             | 1   | 0.485   |
| Age $\geq$ 75 years         | 0.276                                      | 3.904             | 1   | 0.048   | 0.287   | 4.216             | 1   | 0.040   | 0.291   | 4.396             | 1   | 0.036   |
| Years of education $\leq$ 8 |                                            |                   |     |         | 0.290   | 0.015             | 1   | 0.901   | 0.294   | 0.034             | 1   | 0.854   |
| BMI $\geq$ 25               |                                            |                   |     |         | 1.048   | 4.989             | 1   | 0.026   | 1.054   | 4.870             | 1   | 0.027   |
| Abdominal obesity           |                                            |                   |     |         | 0.364   | 1.961             | 1   | 0.161   | 0.370   | 2.029             | 1   | 0.154   |
| Living alone                |                                            |                   |     |         |         |                   |     |         | 0.323   | 0.349             | 1   | 0.555   |
| Automedication              |                                            |                   |     |         |         |                   |     |         | 0.510   | 3.415             | 1   | 0.065   |

This table is related to Table 5 "Logistic regression for the association of frailty according to FTS-5 or FTS-3 as a dependent variable with variables of relevance in health, adjusted by age and sex". S.E, standard error; d.f, degree of freedom.
